# Supplementary material
Source: publisher figshare collection journal article supplement (https://aacr.figshare.com/articles/dataset/_/23905280)

**Supplemental Figure 5. Hi-C interaction and TAD map of CT1, TI1, D7 regions.** The chromatin confirmation of the region encompassing CT1, TI1, and D7 across the 3 HMCLs (U266, RPMI8226, and KMS11) and PC for comparison. The region shows significant variability in the TAD structure at the TENT5C locus across all samples in comparison to PC which could explain its dysregulation.

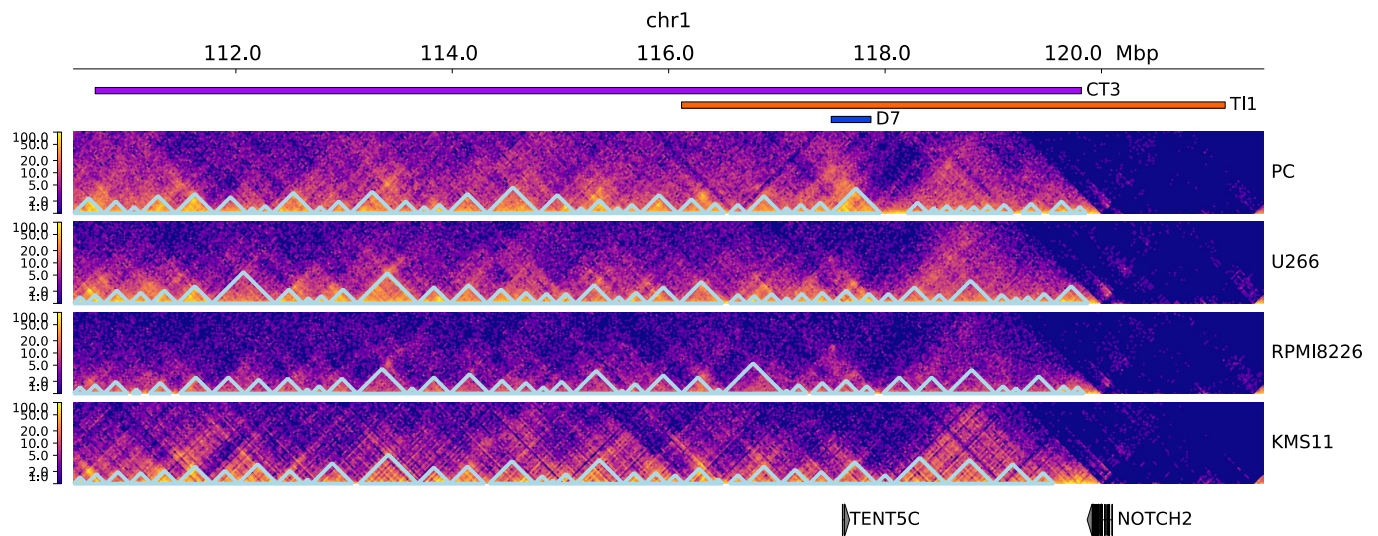

Supplement: Supplementary file 1 [file 41911463]
